# Supplementary material for: Discovery of a transdermally deliverable pentapeptide for activating AdipoR1 to promote hair growth
Source: PubMed Central journal article supplement (PMC8495455; doi:10.15252/emmm.202013790), 2021-09-06
Supplement: EMMM-13-e13790-s006.pdf [file EMMM-13-e13790-s006.pdf]

**Table of contents**

Appendix Figure S1 - siRNA efficiency for *AdipoR1*

Appendix Figure S2 - Topical P5 treatment on *AdipoR1*<sup>-/-</sup> and *WT* mice

Appendix Table S1 - Sequences for site-directed mutagenesis

Appendix Table S2 - Primer sequences for RT-PCR

**Appendix Figure**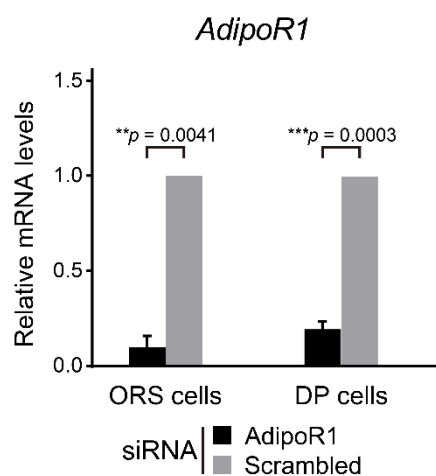**Appendix Figure S1 - siRNA efficiency for *AdipoR1***

The siRNA efficiency for *AdipoR1* in ORS cells ( $n = 3$ ) and DP cells ( $n = 4$ )

Data information: All values are presented as the mean  $\pm$  SEM. Statistical significance was determined using Welch's t test (\*\*  $p < 0.01$  and \*\*\* $p < 0.001$  compared to each scrambled siRNA treated group).

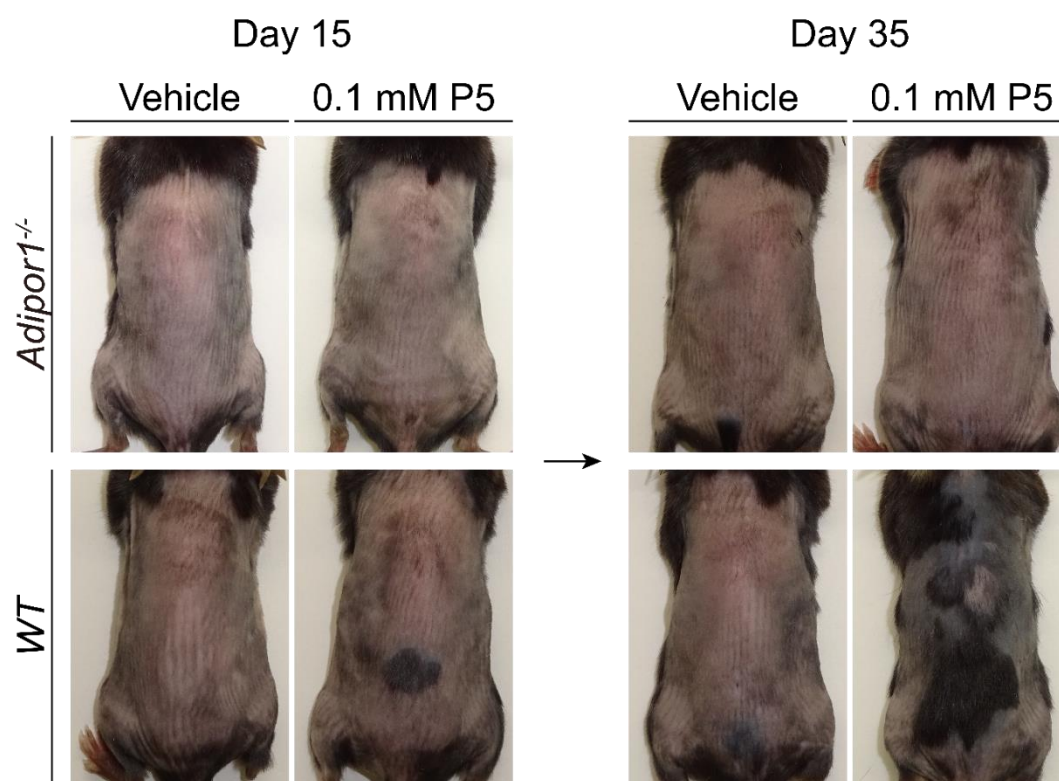

**Appendix Figure S2 - Topical P5 treatment on *Adipor1*<sup>-/-</sup> and WT mice**

In *Adipor1*<sup>-/-</sup> mice, anagen hair cycle is not induced by P5 treatment.

## Appendix Table S1 - Sequences for site-directed mutagenesis

---

|                              |                                              |
|------------------------------|----------------------------------------------|
| <b>AdipoR1 (S231A)</b>       |                                              |
| forward                      | TCTATTATTCTTCTACTGCGCTCCACAGCCACGGCTCATCTA   |
| reverse                      | TAGATGAGCCCGTGGCTGTGGAGCGCAGTAGAAGGAATAATAGA |
| <b>AdipoR1 (Y225A)</b>       |                                              |
| Forward                      | GGAGCTTTGTCCCCTGGCTCGCTTATTCCTTCTACTGCTCCCC  |
| Reverse                      | GGGGAGCAGTAGAAGGAATAAGCGAGCCAGGGGACAAAGCTCC  |
| <b>AdipoR1 (Y226A)</b>       |                                              |
| Forward                      | GCTTTGTCCCCTGGCTCTATGCTTCCTTCTACTGCTCCCCACA  |
| Reverse                      | TGTGGGGAGCAGTAGAAGGAAGCATAGAGCCAGGGGACAAAGC  |
| <b>AdipoR1 (Y229A)</b>       |                                              |
| Forward                      | CCTGGCTCTATTATTCCTTCGCTTGCTCCCCACAGCCACGGCT  |
| Reverse                      | AGCCGTGGCTGTGGGGAGCAAGCGAAGGAATAATAGAGCCAGG  |
| <b>AdipoR1 (F285A)</b>       |                                              |
| Forward                      | GCGTCGTGCCCACCATGCACGCTACTATCGCTGAGGGCTTTGT  |
| Reverse                      | ACAAAGCCCTCAGCGATAGTAGCGTGCATGGTGGGCACGACGC  |
| <b>AdipoR1 (F285E)</b>       |                                              |
| Forward                      | GCGTCGTGCCCACCATGCACGAGACTATCGCTGAGGGCTTTGT  |
| Reverse                      | ACAAAGCCCTCAGCGATAGTCTCGTGCATGGTGGGCACGACGC  |
| <b>AdipoR1 (F285Y)</b>       |                                              |
| forward                      | GCGTCGTGCCCACCATGCACTACACTATCGCTGAGGGCTTTGT  |
| reverse                      | ACAAAGCCCTCAGCGATAGTGTAGTGCATGGTGGGCACGACGC  |
| <b>AdipoR1 (F285K)</b>       |                                              |
| forward                      | GCGTCGTGCCCACCATGCACAAGACTATCGCTGAGGGCTTTGT  |
| reverse                      | ACAAAGCCCTCAGCGATAGTCTTGTGCATGGTGGGCACGACGC  |
| <b>AdipoR1 (E289A)</b>       |                                              |
| forward                      | CCATGCACTTTACTATCGCTGCTGGCTTTGTCAAGGCCACCAC  |
| reverse                      | GTGGTGGCCTTGACAAAGCCAGCAGCGATAGTAAAGTGCATGG  |
| <b>AdipoR1 (E289R)</b>       |                                              |
| forward                      | CCATGCACTTTACTATCGCTCGCGGCTTTGTCAAGGCCACCAC  |
| reverse                      | GTGGTGGCCTTGACAAAGCCGCGAGCGATAGTAAAGTGCATGG  |
| <b>AdipoR1 (F361A)</b>       |                                              |
| forward                      | GAGTCTCCAACCTTCAGGAAGCTCGTTACGGCCTAGAAGGCGG  |
| reverse                      | CCGCCTTCTAGGCCGTAACGAGCTTCTGAAGGTTGGAGACTC   |
| <b>AdipoR1 (R362A)</b>       |                                              |
| forward                      | TCTCCAACCTTCAGGAATTCGCTTACGGCCTAGAAGGCGGCTG  |
| reverse                      | CAGCCGCCTTCTAGGCCGTAAGCGAATTCCTGAAGGTTGGAGA  |
| <b>AdipoR1 (R362E)</b>       |                                              |
| forward                      | TCTCCAACCTTCAGGAATTCGAGTACGGCCTAGAAGGCGGCTG  |
| reverse                      | CAGCCGCCTTCTAGGCCGTAAGCGAATTCCTGAAGGTTGGAGA  |
| <b>AdipoR1 (E366A)</b>       |                                              |
| forward                      | AGGAATTCGTTACGGCCTAGCTGGCGGCTGTACTGATGACAC   |
| reverse                      | GTGTCATCAGTACAGCCGCCAGCTAGGCCGTAACGGAATTCCT  |
| <b>AdipoR1 (F285A/E289A)</b> |                                              |
| forward                      | GCGTCGTGCCCACCATGCACGCTACTATCGCTGCTGGCTTTGT  |
| reverse                      | ACAAAGCCAGCAGCGATAGTAGCGTGCATGGTGGGCACGACGC  |
| <b>AdipoR1 (F285E/E289A)</b> |                                              |
| forward                      | GCGTCGTGCCCACCATGCACGAGACTATCGCTGCTGGCTTTGT  |
| reverse                      | ACAAAGCCAGCAGCGATAGTCTCGTGCATGGTGGGCACGACGC  |

---

**Appendix Table S2 - Primer sequences for RT-PCR**

---

|                    |                             |
|--------------------|-----------------------------|
| <b>Human IGF-1</b> |                             |
| forward            | TTC AAC AAG CCC ACA GGG     |
| reverse            | GGT GCG CAA TAC ATC TCC     |
| <b>Human VEGFA</b> |                             |
| forward            | ACT TCT GGG CTG TTC TCG     |
| reverse            | TCC TCT TCC TTC TCT TCT TC  |
| <b>Human HGF</b>   |                             |
| forward            | CGC AGC TAC AAG GGA ACA GT  |
| reverse            | TCC TGT AGG TCT TTA CCC CGA |
| <b>Human PDGFA</b> |                             |
| forward            | GCC CAT TCG GAG GAA GAG     |
| reverse            | TTG GCC ACC TTG ACG CTG CG  |
| <b>Human FGF-7</b> |                             |
| forward            | TTG TGG CAA TCA AAG GGG TG  |
| reverse            | CCT CCG TTG TGT GTC CAT TT  |

---
